# Supplementary material
Source: Research Square preprint supplement (doi:10.21203/rs.3.rs-9837076/v1)
Supplement: Supplementary file 1 [file 20b4453a79a58e132d35541d.xlsx]

## Sheet: Supplementary_107_sp.
	Species data
		Taxonomy						BUSCO
	kingdom		Species	Source	data type		# Genes	lineage	Complete	Single	Duplicated	Fragmented	Missing
Sr no. 1	Amoebozoa		Acytostelium subglobosum LB1	GCF_000787575.1	protein		255	eukaryota_odb10	92.2	89.8	2.4	3.1	4.7
Sr no. 2	Amoebozoa		Dictyostelium discoideum AX4 (cellular slime mold)	UP000002195	protein		255	eukaryota_odb10	94.1	92.2	2	1.6	4.3
Sr no. 3	Amoebozoa		Mastigamoeba balamuthi	EP00727	protein		255	eukaryota_odb10	80.8	78	2.7	3.9	15.3
Sr no. 4	Amoebozoa		Vermamoeba vermiformis	EP00029	protein		255	eukaryota_odb10	89.4	83.9	5.5	3.1	7.5
Sr no. 5	Ancyromonadida (biflagellated protists)		Nutomonas longa	EP00162	protein		255	eukaryota_odb10	51	47.5	3.5	28.2	20.8
Sr no. 6	CRuMs		Diphylleia rotans	EP00002	protein		255	eukaryota_odb10	90.6	54.5	36.1	2.4	6.3
Sr no. 7	CRuMs		Rigifila ramosa	EP00004	protein		255	eukaryota_odb10	84.3	65.1	19.2	9.4	6.3
Sr no. 8	Apusomonadida(protozoan zooflagellates)		Thecamonas trahens	EP00031	protein		255	eukaryota_odb10	81.2	80.8	0.4	7.8	11
Sr no. 9	Breviatea (amitochondriate protists with uncertain phylogenetic position)		Pygsuia biforma	EP00033	protein		255	eukaryota_odb10	61.6	61.6	0	15.7	22.7
Sr no. 10	Metazoa (multicellular eukaryotic, heterotrophic)	Echinodermata	Acanthaster planci (Crown-of-thorns starfish)	UP000694845	protein		255	eukaryota_odb10	99.6	82	17.6	0.4	0
Sr no. 11	Metazoa (multicellular eukaryotic, heterotrophic)	Echinodermata	Patiria miniata (bat star)	GCF_015706575.1	protein		255	eukaryota_odb10	99.2	68.6	30.6	0.4	0.4
Sr no. 12	Metazoa (multicellular eukaryotic, heterotrophic)	Echinodermata	Anneissia japonica	GCF_011630105.1	protein		255	eukaryota_odb10	96.5	71.8	24.7	1.6	2
Sr no. 13	Metazoa	Echinodermata	Strongylocentrotus purpuratus	EP00057	protein		255	eukaryota_odb10	95.3	67.1	28.2	3.9	0.8
Sr no. 14	Metazoa	Chordata	Callorhinchus milii (elephant shark)	GCF_018977255.1	protein		255	eukaryota_odb10	95.3	69.8	25.5	1.2	3.5
Sr no. 15	Metazoa	Chordata	Gallus gallus (chicken)	UP000000539	protein		255	eukaryota_odb10	96.9	33.7	63.1	1.2	2
Sr no. 16	Metazoa	Chordata	Xenopus tropicalis (tropical clawed frog)	GCF_000004195.4	protein		255	eukaryota_odb10	100	65.1	34.9	0	0
Sr no. 17	Metazoa	Chordata	Branchiostoma belcheri (Belcher's lancelet)	UP000515135	protein		255	eukaryota_odb10	100	87.1	12.9	0	0
Sr no. 18	Metazoa	Chordata	Danio rerio (zebrafish)	EP00067	protein		255	eukaryota_odb10	100	75.7	24.3	0	0
Sr no. 19	Metazoa	Chordata	Takifugu rubripes (torafugu)	GCF_901000725.2	protein		255	eukaryota_odb10	98.8	67.8	31	0	1.2
Sr no. 20	Metazoa	Chordata	Latimeria chalumnae (coelacanth)	GCF_037176945.1	protein		255	eukaryota_odb10	100	68.2	31.8	0	0
Sr no. 21	Metazoa	Chordata	Lethenteron reissneri (Far Eastern brook lamprey)	GCF_015708825.1	protein		255	eukaryota_odb10	84.3	56.1	28.2	1.6	14.1
Sr no. 22	Metazoa	Chordata	Petromyzon marinus (sea lamprey)	GCF_010993605.1	protein		255	eukaryota_odb10	94.5	58.8	35.7	2.7	2.7
Sr no. 23	Metazoa	Chordata	Anolis carolinensis (green anole)	GCF_035594765.1	protein		255	eukaryota_odb10	100	65.5	34.5	0	0
Sr no. 24	Metazoa	Chordata	Monodelphis domestica (gray short-tailed opossum)	GCA_000002295.2	protein		255	eukaryota_odb10	96.5	56.9	39.6	3.1	0.4
Sr no. 25	Metazoa	Chordata	Homo sapiens (human)	UP000005640	protein		255	eukaryota_odb10	100	59.2	40.8	0	0
Sr no. 26	Metazoa	Chordata	Mus musculus (house mouse)	UP000000589	protein		255	eukaryota_odb10	100	65.1	34.9	0	0
Sr no. 27	Metazoa	Chordata	Ciona intestinalis (yellow sea squirt)	EP00059	protein		255	eukaryota_odb10	97.6	85.5	12.2	1.2	1.2
Sr no. 28	Metazoa	Arthropoda	Argiope bruennichi	GCF_947563725.1	protein		255	eukaryota_odb10	98.8	82.7	16.1	0.4	0.8
Sr no. 29	Metazoa	Arthropoda	Uloborus diversus	GCF_026930045.1	protein		255	eukaryota_odb10	95.7	76.1	19.6	0.4	3.9
Sr no. 30	Metazoa	Arthropoda	Daphnia pulex	UP000000305	protein		255	eukaryota_odb10	97.3	94.9	2.4	0.8	2
Sr no. 31	Metazoa	Arthropoda	Ornithodoros turicata	GCF_037126465.1	protein		255	eukaryota_odb10	99.2	74.9	24.3	0	0.8
Sr no. 32	Metazoa	Arthropoda	Centruroides vittatus	GCF_030686945.1	protein		255	eukaryota_odb10	99.6	78.4	21.2	0.4	0
Sr no. 33	Metazoa	Arthropoda	Dermacentor albipictus	GCF_038994185.2	protein		255	eukaryota_odb10	99.6	70.2	29.4	0.4	0
Sr no. 34	Metazoa	Arthropoda	Drosophila melanogaster	UP000000803	protein		255	eukaryota_odb10	100	84.7	15.3	0	0
Sr no. 35	Metazoa	Nematoda	Caenorhabditis elegans	EP00081	protein		255	eukaryota_odb10	98	86.7	11.4	0.8	1.2
Sr no. 36	Metazoa	Annelida	Helobdella robusta	UP000015101	protein		255	eukaryota_odb10	96.9	95.7	1.2	2	1.2
Sr no. 37	Metazoa	Annelida	Capitella teleta	EP00103	protein		255	eukaryota_odb10	94.1	91.8	2.4	4.3	1.6
Sr no. 38	Metazoa	Brachiopoda (that have hard "valves" on the upper and lower surfaces)	Lingula unguis	UP000085678	protein		255	eukaryota_odb10	98.4	65.5	32.9	1.2	0.4
Sr no. 39	Metazoa	Mollusca	Magallana gigas	GCF_963853765.1	protein		255	eukaryota_odb10	96.9	71	25.9	0.4	2.7
Sr no. 40	Metazoa	Mollusca	Lottia gigantea	GCF_000327385.1	protein		255	eukaryota_odb10	96.5	95.3	1.2	2.4	1.2
Sr no. 41	Metazoa	Rotifera	Adineta vaga	GCA_021613535.1	protein		255	eukaryota_odb10	94.9	78.4	16.5	1.2	3.9
Sr no. 42	Metazoa	Acoela (a deep branching bilaterian group of animals, which resemble flatworms.)	Symsagittifera roscoffensis	GCF_963678635.1	protein		255	eukaryota_odb10	94.9	78.4	16.5	1.2	3.9
Sr no. 43	Metazoa	Cnidaria	Nematostella vectensis (starlet sea anemone)	https://simrbase.stowers.org/files/pub/nematostella/Nvec/genomes/Nvec200/aligned/tcs_v2/20240221/NV2g.20240221.protein.fa	protein		255	eukaryota_odb10	90.2	73.3	16.9	6.3	3.5
Sr no. 44	Metazoa	Cnidaria	Fungia scutaria	http://reefgenomics.org/	protein		255	eukaryota_odb10	83.1	81.2	2	15.3	1.6
Sr no. 45	Metazoa	Cnidaria	Stylophora pistillata (Smooth Cauliflower Coral)	UP000225706	protein		255	eukaryota_odb10	83.9	83.5	0.4	9.8	6.3
Sr no. 46	Metazoa	Cnidaria	Pocillopora damicornis (lace coral)	GCF_003704095.1	protein		255	eukaryota_odb10	94.1	86.7	7.5	3.1	2.7
Sr no. 47	Metazoa	Cnidaria	Acropora muricata	GCF_036669905.1	protein		255	eukaryota_odb10	99.6	74.1	25.5	0	0.4
Sr no. 48	Metazoa	Cnidaria	Dendronephthya gigantea	GCF_004324835.1	protein		255	eukaryota_odb10	98.4	73.7	24.7	0.4	1.2
Sr no. 49	Metazoa	Cnidaria	Actinia tenebrosa (Australian red waratah sea anemone)	GCF_009602425.1	protein		255	eukaryota_odb10	98.4	87.1	11.4	1.2	0.4
Sr no. 50	Metazoa	Cnidaria	Hydra vulgaris (swiftwater hydra)	GCF_038396675.1	protein		255	eukaryota_odb10	98.8	77.3	21.6	0	1.2
Sr no. 51	Metazoa	Cnidaria	Hydractinia symbiolongicarpus	GCF_029227915.1	protein		255	eukaryota_odb10	98.8	69.8	29	0.4	0.8
Sr no. 52	Metazoa	Cnidaria	Pocillopora verrucosa	GCF_036669915.1	protein		255	eukaryota_odb10	99.2	86.7	12.5	0	0.8
Sr no. 53	Metazoa	Cnidaria	Montipora foliosa	GCF_036669935.1	protein		255	eukaryota_odb10	98.4	70.2	28.2	0.4	1.2
Sr no. 54	Metazoa	Cnidaria	Exaiptasia diaphana	GCF_001417965.1	protein		255	eukaryota_odb10	95.7	85.1	10.6	3.1	1.2
Sr no. 55	Metazoa	Cnidaria	Acropora digitifera	GCF_000222465.1	protein		255	eukaryota_odb10	74.1	60.8	13.3	18.4	7.5
Sr no. 56	Metazoa	Cnidaria	Orbicella faveolata	GCF_002042975.1	protein		255	eukaryota_odb10	86.3	71.8	14.5	8.2	5.5
Sr no. 57	Metazoa	Cnidaria	Desmophyllum pertusum	GCA_029204205.1	protein		255	eukaryota_odb10	72.9	71.8	1.2	17.6	9.4
Sr no. 58	Metazoa	Cnidaria	Clytia hemisphaerica	UP000594262	protein		255	eukaryota_odb11	86.7	81.2	5.5	3.5	9.8
Sr no. 59	Metazoa	Cnidaria	Rhopilema esculentum	GCF_013076305.1	protein		255	eukaryota_odb10	99.2	82.7	16.5	0.8	0
Sr no. 60	Metazoa	Ctenophora	Bolinopsis microptera	GCA_026151205.1	protein		255	eukaryota_odb10	92.5	79.2	13.3	0.4	7.1
Sr no. 61	Metazoa	Placozoa	Trichoplax adhaerens	EP00114	protein		255	eukaryota_odb10	96.1	95.7	0.4	2.7	1.2
Sr no. 62	Metazoa	Porifera	Sycon ciliatum	GCF_964019385.1	protein		255	eukaryota_odb10	93.3	83.5	9.8	1.2	5.5
Sr no. 63	Metazoa	Porifera	Amphimedon queenslandica	EP00119	protein		255	eukaryota_odb10	95.3	78	17.3	2.7	2
Sr no. 64	Metazoa	Porifera	Oscarella pearsei	EP00118	protein		255	eukaryota_odb10	94.9	92.2	2.7	2.4	2.7
Sr no. 65	Holozoa	Pluriformea	Corallochytrium limacisporum	EP00127	protein		255	eukaryota_odb10	90.6	89.8	0.8	3.9	5.5
Sr no. 66	Holozoa	Pluriformea	Syssomonas multiformis	EP00128	protein		255	eukaryota_odb10	58	37.3	20.8	14.5	27.5
Sr no. 67	Holozoa	Choanoflagellatea	Monosiga brevicollis MX1	GCF_000002865.3	protein		255	eukaryota_odb10	79.2	78.8	0.4	7.1	13.7
Sr no. 68	Holozoa	Choanoflagellatea	Salpingoeca rosetta	GCF_000188695.1	protein		255	eukaryota_odb10	82.7	82	0.8	7.5	9.8
Sr no. 69	Holozoa	Choanoflagellatea	Salpingoeca kvevrii	EP00050	protein		255	eukaryota_odb10	95.3	87.1	8.2	2.7	2
Sr no. 70	Holozoa	Filasterea	Capsaspora owczarzaki	UP000008743	protein		255	eukaryota_odb10	93.7	85.1	8.6	2.4	3.9
Sr no. 71	Holozoa	Ichthyosporea	Amoebidium parasiticum	EP00123	protein		255	eukaryota_odb10	89.4	82.4	7.1	7.1	3.5
Sr no. 72	Fungi	Ascomycota	Aspergillus niger CBS 513.88 (black aspergilli)	UP000068243	protein		255	eukaryota_odb10	96.5	96.1	0.4	1.6	2
Sr no. 73	Fungi	Ascomycota	Fusarium oxysporum f. sp. lycopersici 4287	UP000002489	protein		255	eukaryota_odb10	93.3	92.5	0.8	4.7	2
Sr no. 74	Fungi	Basidiomycota	Agaricus bisporus var. burnettii JB137-S8	UP000008493	protein		255	eukaryota_odb10	94.1	92.5	1.6	2.7	3.1
Sr no. 75	Fungi	Basidiomycota	Ustilago maydis	EP00150	protein		255	eukaryota_odb10	99.2	98.8	0.4	0	0.8
Sr no. 76	Fungi	Chytridiomycota	Spizellomyces punctatus	UP000053201	protein		255	eukaryota_odb10	94.5	92.5	2	3.1	2.4
Sr no. 77	Fungi	Mucoromycota	Mortierella elongata	UP000078512	protein		255	eukaryota_odb10	98	94.9	3.1	1.6	0.4
Sr no. 78	Fungi	Mucoromycota	Rhizopus microsporus	UP000242254	protein		255	eukaryota_odb10	97.3	95.3	2	2	0.8
Sr no. 79	Rotosphaerida		Fonticula alba	UP000030693	protein		255	eukaryota_odb10	72.2	69.8	2.4	9.8	18
Sr no. 80	Rotosphaerida		Parvularia atlantis	EP00160	protein		255	eukaryota_odb10	76.1	70.2	5.9	18.8	5.1
Sr no. 81	Viridiplantae	Chlorophyta	Chlamydomonas reinhardtii	UP000006906	protein		255	eukaryota_odb10	92.2	89.4	2.7	3.9	3.9
Sr no. 82	Viridiplantae	Chlorophyta	Coccomyxa subellipsoidea	UP000007264	protein		255	eukaryota_odb10	85.9	85.1	0.8	4.7	9.4
Sr no. 83	Viridiplantae	Streptophyta	Physcomitrella patens	EP00247	protein		255	eukaryota_odb10	100	45.1	54.9	0	0
Sr no. 84	Viridiplantae	Streptophyta	Pyrus communis (pear)	GCF_963583255.1	protein		255	eukaryota_odb10	99.2	24.7	74.5	0	0.8
Sr no. 85	Viridiplantae	Streptophyta	Amborella trichopoda	EP00254	protein		255	eukaryota_odb10	99.2	44.7	54.5	0.8	0
Sr no. 86	Viridiplantae	Streptophyta	Arabidopsis thaliana	EP00260	protein		255	eukaryota_odb10	100	42.7	57.3	0	0
Sr no. 87	Gloeochaetales	Glaucophyta	Gloeochaete wittrockiana	EP00276	protein		255	eukaryota_odb10	86.7	64.3	22.4	4.7	8.6
Sr no. 88	Gloeochaetales	Glaucophyta	Cyanophora paradoxa	EP00741	protein		255	eukaryota_odb10	83.9	81.6	2.4	4.7	11.4
Sr no. 89	Rhodelphis		Rhodelphis marinus	EP00736	protein		255	eukaryota_odb10	89	87.5	1.6	6.3	4.7
Sr no. 90	Rhodophyta		Galdieria sulphuraria	EP00167	protein		255	eukaryota_odb10	78	67.5	10.6	7.5	14.5
Sr no. 91	Rhodophyta		Rhodosorus marinus	EP00189	protein		255	eukaryota_odb10	72.9	50.2	22.7	5.9	21.2
Sr no. 92	Cryptophyceae		Baffinella sp CCMP2293	EP00290	protein		255	eukaryota_odb10	72.9	50.2	22.7	5.9	21.2
Sr no. 93	Cryptophyceae		Guillardia theta	EP00279	protein		255	eukaryota_odb10	79.2	75.3	3.9	11	9.8
Sr no. 94	Discoba		Euglena longa	EP00668	protein		255	eukaryota_odb10	83.5	71.8	11.8	6.7	9.8
Sr no. 95	Discoba		Pharyngomonas kirbyi	EP00761	protein		255	eukaryota_odb10	84.7	83.1	1.6	7.1	8.2
Sr no. 96	Metamonada		Carpediemonas membranifera	GCA_019828565.1	protein		255	eukaryota_odb10	48.6	39.2	9.4	11.4	40
Sr no. 97	Metamonada		Monocercomonoides exilis	EP00770	protein		255	eukaryota_odb10	55.7	47.5	8.2	8.2	36.1
Sr no. 98	Haptista		Choanocystis spHF7	EP00300	protein		255	eukaryota_odb10	87.8	48.6	39.2	4.7	7.5
Sr no. 99	Ancoracysta		Ancoracysta twista	EP00164	protein		255	eukaryota_odb10	56.1	54.5	1.6	23.5	20.4
Sr no. 100	Telonemia		Telonemia subtile	EP00656	protein		255	eukaryota_odb10	81.2	49.8	31.4	9.4	9.4
Sr no. 101	Malawimonadidae		Gefionella okellyi	EP00698	protein		255	eukaryota_odb10	78.8	60.8	18	2.7	18.4
Sr no. 102	Alveolata		Tetrahymena thermophila	EP00333	protein		255	eukaryota_odb10	75.3	71	4.3	5.1	19.6
Sr no. 103	Alveolata		Colponemidia sp Colp-10	EP00742	protein		255	eukaryota_odb10	93.3	88.6	4.7	2.7	3.9
Sr no. 104	Rhizaria		Plasmodiophora brassicae	EP00473	protein		255	eukaryota_odb10	88.6	87.8	0.8	3.9	7.5
Sr no. 105	Rhizaria		Reticulomyxa filosa	GCA_000512085.1	protein		255	eukaryota_odb10	36.9	34.5	2.4	27.8	35.3
Sr no. 106	Stramenopiles		Aphanomyces astaci	GCF_000520075.1	protein		255	eukaryota_odb10	94.9	70.6	24.3	1.6	3.5
Sr no. 107	Stramenopiles		Bremia lactucae (lettuce downy mildew)	GCF_004359215.1	protein		255	eukaryota_odb10	86.3	83.9	2.4	3.9	9.8
									(Complete Count when >80): 89
Note:
EP* is eukaryotic data from : https://doi.org/10.24072/pcjournal.173
SRR*, DRR*, ERR* are from ENA browser
UP* uniprot id
Amoebazoa: group containing about 2,400 described species of amoeboid protists, often possessing blunt, fingerlike, lobose pseudopods and tubular mitochondrial cristae.
Ancyromonadida or Planomonadida is a small group of biflagellated protists found in the soil and in aquatic habitats, where they feed on bacteria.
CRuMs is a proposed clade of microbial eukaryotes that includes the Collodictyonidae, Rigifilida, and Mantamonadida groups. The name CRuMs is an acronym for these three groups.
apusomonads are a group of protozoan zooflagellates that glide on surfaces, and mostly consume prokaryotes.
Breviatea, commonly known as breviate amoebae, are a group of free-living, amitochondriate protists with uncertain phylogenetic position.
Metazoa: a major division of the animal kingdom that comprises all animals other than protozoans and sponges. They are multicellular animals with differentiated tissues.
Holozoa is a clade of organisms that includes animals and their closest single-celled relatives, but excludes fungi and all other organisms.
Fungi are a diverse group of eukaryotic organisms, including yeasts, molds, and mushrooms, that are neither plants nor animals
Rotosphaerids are unicellular, heterotrophic, eukayotic protists that have filopodia, an exterior covering consisting of highly ornamented siliceous scales, and are classified in the Rotosphaerida within the opistokont lineage.
Viridiplantae (green plants) are a clade of photosynthetic organisms that contain chlorophylls a and b, produce and store their photosynthetic products inside a double-membrane-bounded chloroplast, and have cell walls that typically contain cellulose.
The glaucophytes or glaucocystophytes or glaucocystids, are a small group of unicellular algae found in freshwater and moist terrestrial environments,less common today than they were during the Proterozoic.
Rhodelphis is a single-celled archaeplastid that lives in aquatic environments and is the sister group to red algae and possibly Picozoa.
Rhodophyta are a sub-group of algae, the red algae. Even though they are called 'red algae', not all species are necessarily red.
Cryptophyceae is a class of motile, usually brownish-green algae, often called cryptomonads. They are generally unicellular, biflagellate organisms found in both freshwater and marine environments.
Discoba is a group (clade) within the protists characterized by having mitochondria with discoidal cristae. It includes several lineages, such as Jakobida, Euglenozoa, Heterolobosea, and Tsukubamonadida.
The metamonads are a large group of flagellate amitochondriate microscopic eukaryotes. They include the retortamonads, diplomonads, parabasalids, oxymonads, and a range of more poorly studied taxa, most of which are free-living flagellates.
Haptista is a proposed group of protists made up of centrohelids and haptophytes.
Ancoracysta is a genus of eukaryotic microbes containing the species Ancoracysta twista, a predatory protist that appears to be related to Haptista.
Telonemia is a phylum of microscopic eukaryotes commonly known as telonemids. They are unicellular free-living flagellates with a unique combination of cell structures, including a highly complex cytoskeleton unseen in other eukaryotes.
Malawimonadidae is a family of unicellular eukaryotes of outsize importance in understanding eukaryote phylogeny. Malawimonadidae is a unique and relatively lesser-known group of flagellate protists belonging to the phylum Malawimonada.
The alveolates are a group of protists, considered a major clade and superphylum within Eukarya.
The Rhizaria are a diverse and species-rich supergroup of mostly unicellular eukaryotes. Except for the Chlorarachniophytes and three species in the genus Paulinella in the phylum Cercozoa, they are all non-photosynthetic, but many Foraminifera and Radiolaria have a symbiotic relationship with unicellular algae.
The stramenopiles, also called heterokonts, are a clade of organisms distinguished by the presence of stiff tripartite external hairs. In most species, the hairs are attached to flagella, in some they are attached to other areas of the cellular surface, and in some they have been secondarily lost.

## Sheet: query accession number
Histaminergic System
Gene Family	Protein Name	Gene Symbol	Organism	UniProtKB Accession	UniProt Entry
Histamine synthesis	Histidine decarboxylase	HDC	Homo sapiens	P19113	DCHS_HUMAN
Histamine catabolism	Histamine N-methyltransferase	HNMT	Homo sapiens	P50135	HNMT_HUMAN
Histamine catabolism	Diamine oxidase	AOC1	Homo sapiens	P19801	AOC1_HUMAN
Histamine catabolism	Monoamine oxidase B	MAOB	Homo sapiens	P27338	AOFB_HUMAN
Histamine receptor	Histamine receptor H1	HRH1	Homo sapiens	P35367	HRH1_HUMAN
Histamine receptor	Histamine receptor H2	HRH2	Homo sapiens	P25021	HRH2_HUMAN
Histamine receptor	Histamine receptor H3	HRH3	Homo sapiens	Q9Y5N1	HRH3_HUMAN
Histamine receptor	Histamine receptor H4	HRH4	Homo sapiens	Q9H3N8	HRH4_HUMAN
Histamine transporter	VMAT2	SLC18A2	Homo sapiens	Q05940	VMAT2_HUMAN
Histamine transporter	2026-10-02	SLC22A2	Homo sapiens	O15244	S22A2_HUMAN
Histamine transporter	2026-10-03	SLC22A3	Homo sapiens	O75751	S22A3_HUMAN
Histamine transporter	PMAT	SLC29A4	Homo sapiens	Q7RTT9	S29A4_HUMAN
