# Supplementary material
Source: Research Square preprint supplement (doi:10.21203/rs.3.rs-9837076/v1)

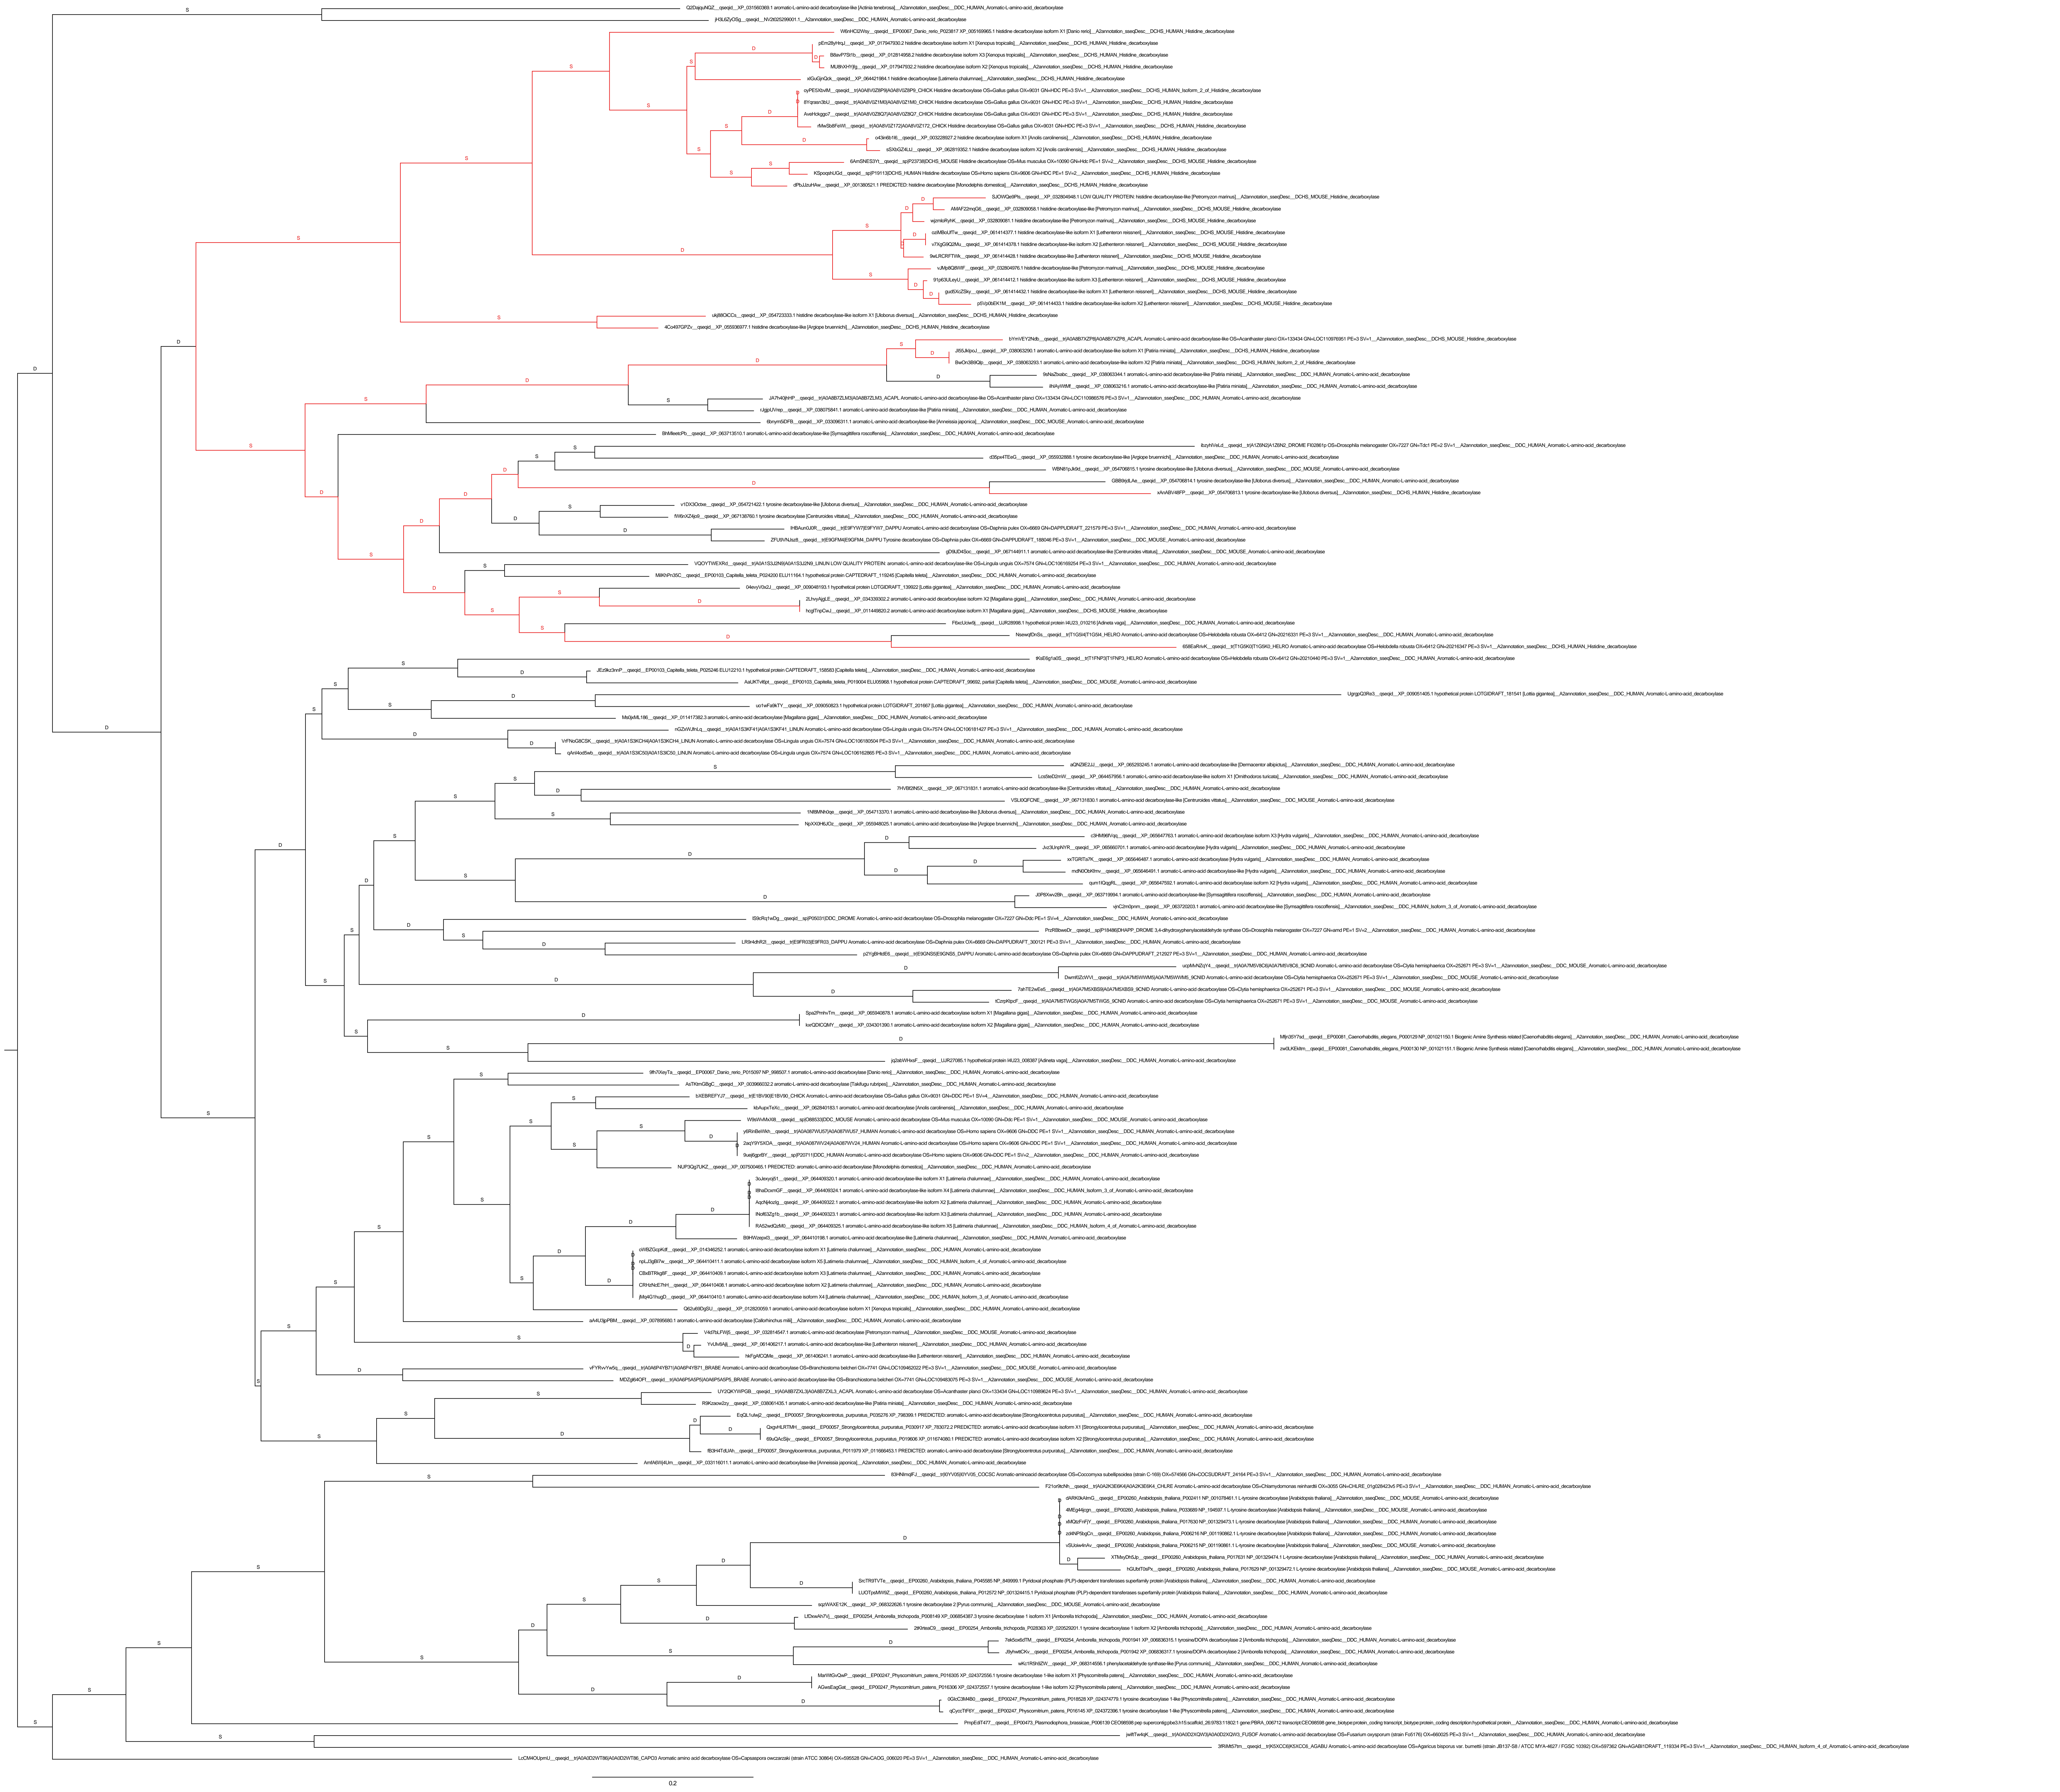

Supplement: Supplementary file 1 [file histamin_UFB_reconc_biosynthesis_unmasked.newick.pdf › histamin_UFB_reconc_biosynthesis_unmasked.newick.pdf]

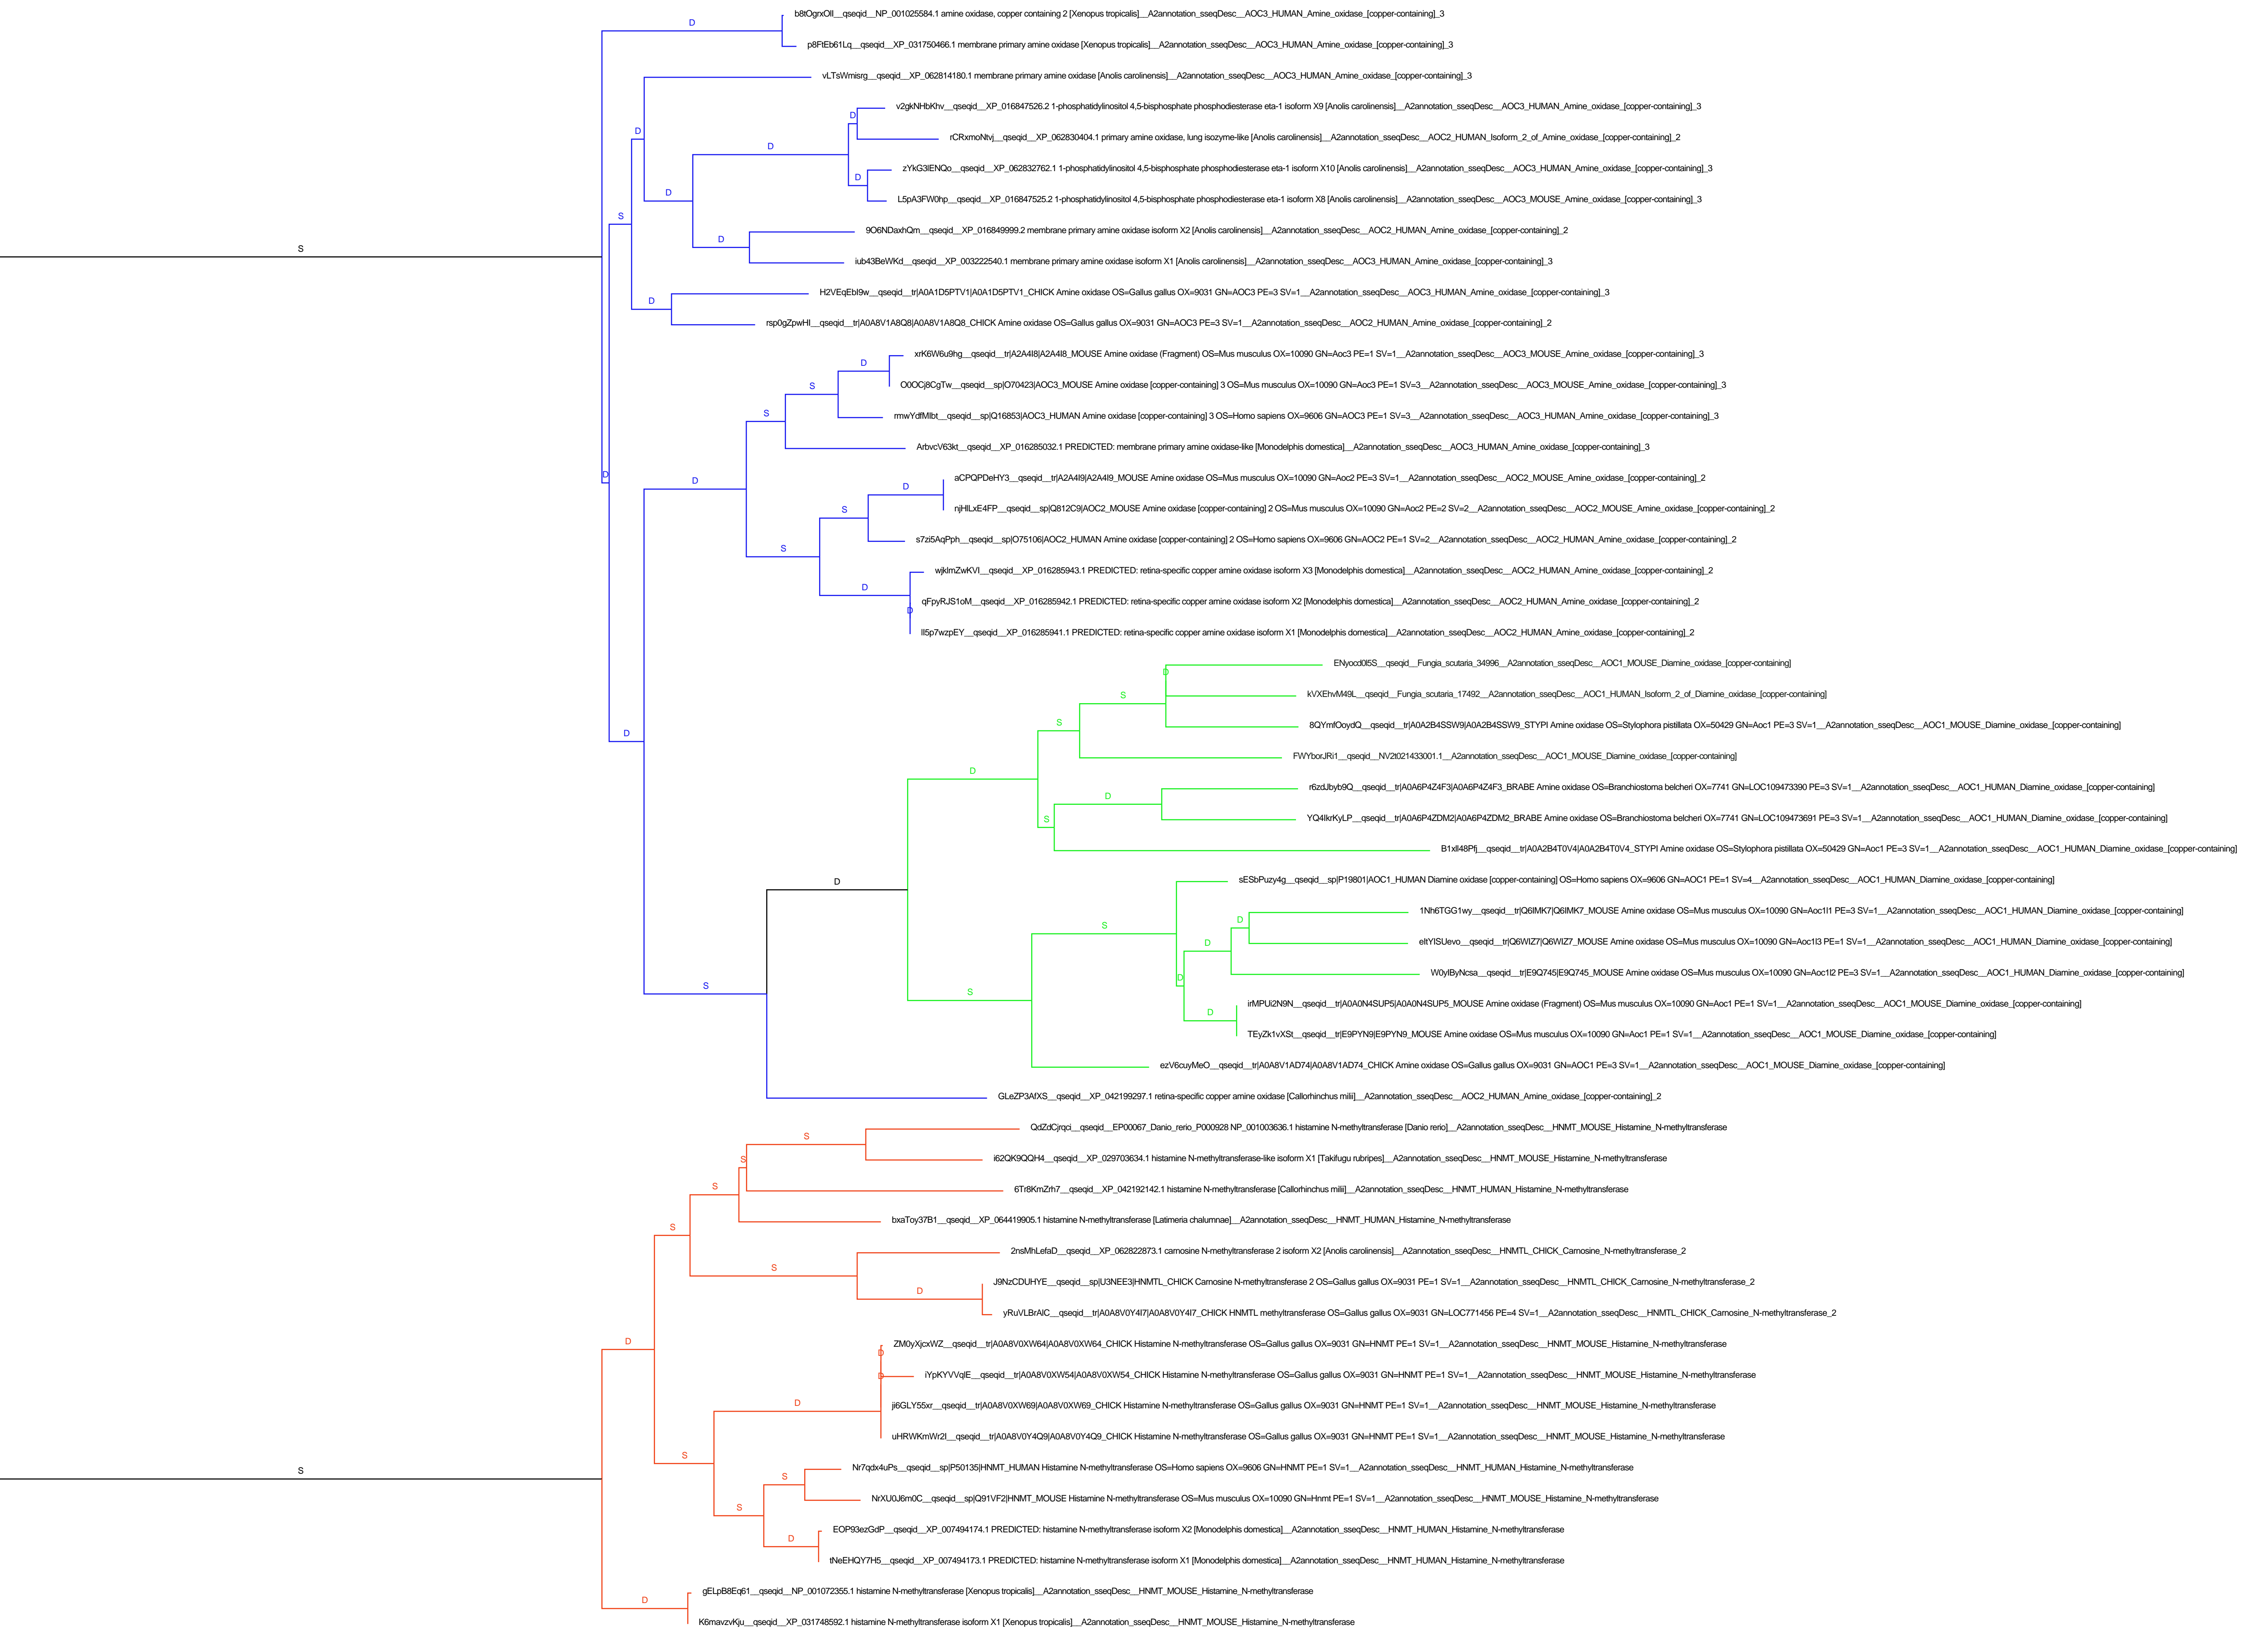

Supplement: Supplementary file 2 [file histamin_UFB_reconc_catabolism_unmasked.newick.pdf › histamin_UFB_reconc_catabolism_unmasked.newick.pdf]

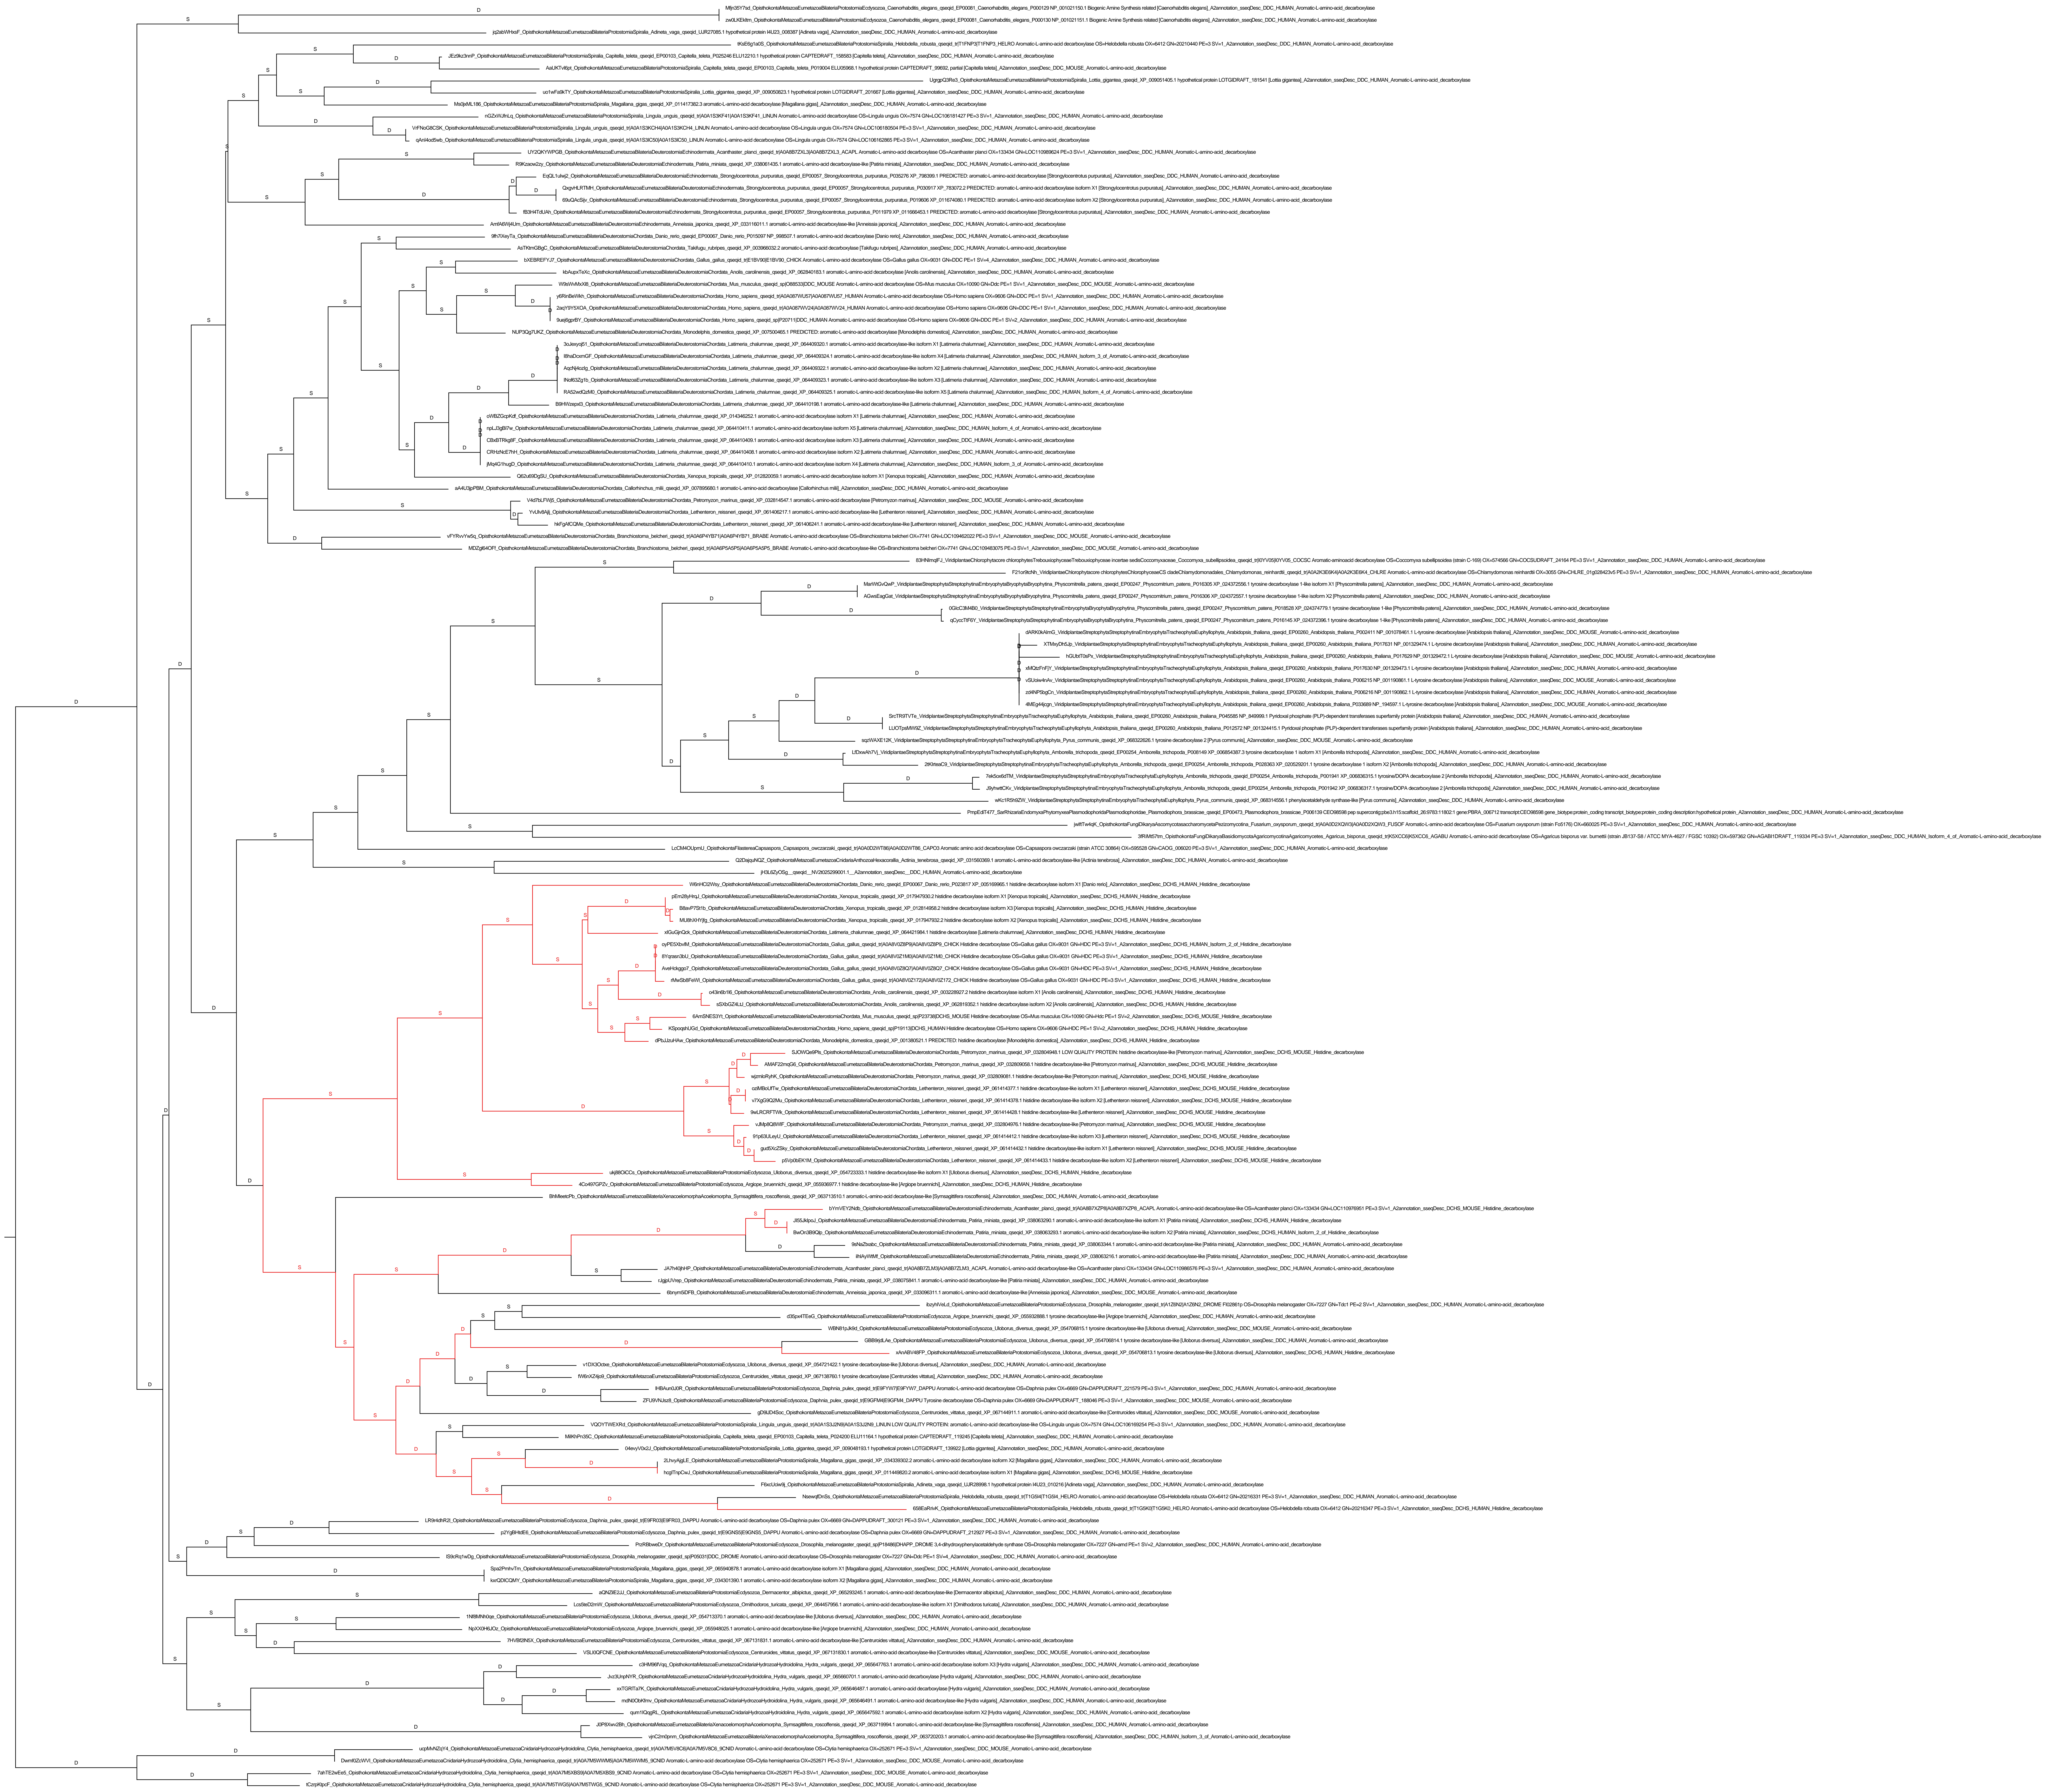

Supplement: Supplementary file 5 [file histamine_TBE_reconc_biosynthesis_unmasked.newick.pdf › histamine_TBE_reconc_biosynthesis_unmasked.newick.pdf]

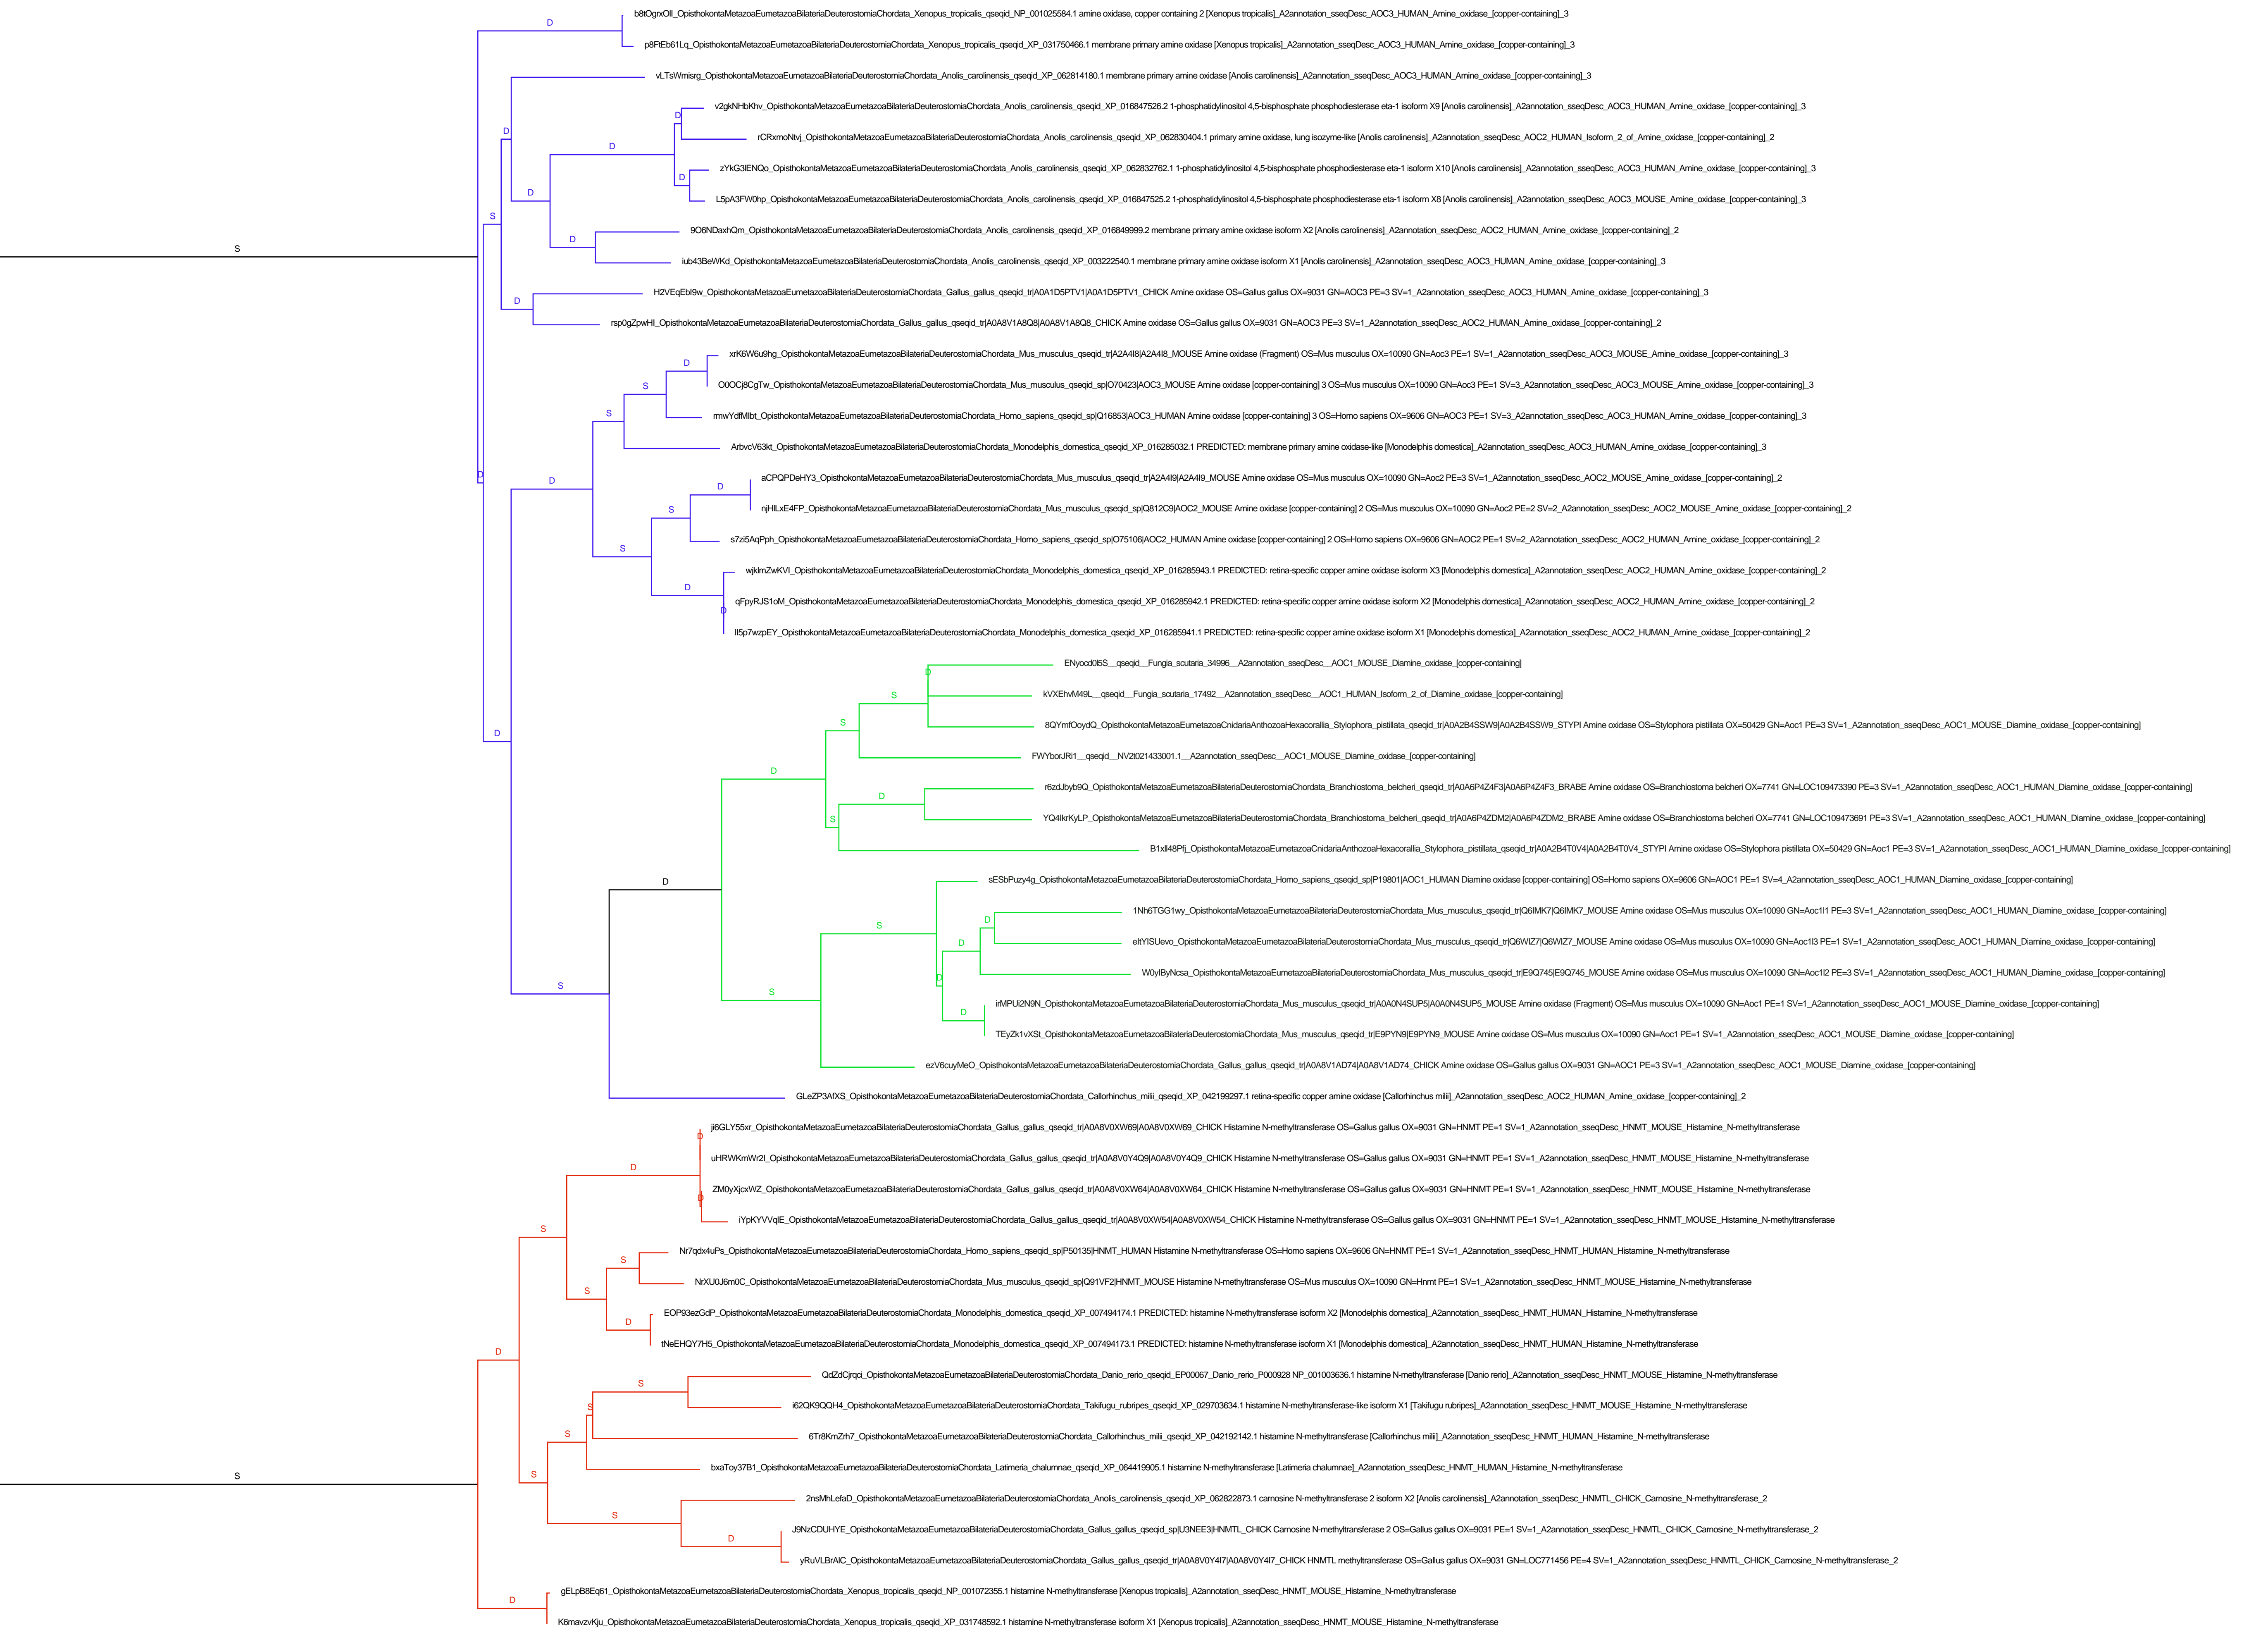

Supplement: Supplementary file 6 [file histamine_TBE_reconc_catabolism_unmasked.newick.pdf › histamine_TBE_reconc_catabolism_unmasked.newick.pdf]
